# Supplementary material for: Dietary Curcumin Supplementation Could Improve Muscle Quality, Antioxidant Enzyme Activities and the Gut Microbiota Structure of Pelodiscus sinensis
Source: MDPI journal article supplement (doi:10.3390/ani13162626), 2023-08-14
Supplement: s1 [file s1]

**Table S1.** Composition and proximate analysis of experimental diets. Data are given in g/kg (on dry weight basis)

|                              | CM0   | CM0.5 | CM1   | CM2   | CM4   |
|------------------------------|-------|-------|-------|-------|-------|
| Ingredients (g/kg)           |       |       |       |       |       |
| White fish meal              | 400   | 400   | 400   | 400   | 400   |
| Soybean meal                 | 100   | 100   | 100   | 100   | 100   |
| Soy protein concentration    | 100   | 100   | 100   | 100   | 100   |
| Yeast meal                   | 60    | 60    | 60    | 60    | 60    |
| Fish oil                     | 33    | 33    | 33    | 33    | 33    |
| Soybean oil                  | 33    | 33    | 33    | 33    | 33    |
| $\alpha$ -starch             | 200   | 200   | 200   | 200   | 200   |
| Zeolite powder               | 16.5  | 16.5  | 16.5  | 16.5  | 16.5  |
| <sup>1</sup> Vitamin premix  | 5     | 5     | 5     | 5     | 5     |
| <sup>2</sup> Mineral premix  | 20    | 20    | 20    | 20    | 20    |
| Dicalcium phosphate          | 20    | 20    | 20    | 20    | 20    |
| Choline chloride             | 2.5   | 2.5   | 2.5   | 2.5   | 2.5   |
| Cellulose                    | 10    | 9.5   | 9     | 8     | 6     |
| Curcumin                     | 0     | 0.5   | 1     | 2     | 4     |
| Proximate composition (g/kg) |       |       |       |       |       |
| Moisture                     | 83.9  | 81.5  | 84.1  | 82.1  | 84.6  |
| Crude protein                | 428.0 | 411.1 | 420.3 | 430.1 | 426.5 |
| Crude lipid                  | 91.9  | 93.6  | 88.8  | 87.4  | 89.1  |
| Ash                          | 144.6 | 150.7 | 136.7 | 145.9 | 140.9 |

<sup>1</sup>Vitamin mixture (mg/kg diet): thiamine hydrochloride, 5; riboflavin, 20; calcium pantothenate, 10; D-biotin, 0.6; pyridoxine hydrochloride, 10; folic acid, 1; inositol, 1000; L-ascorbyl-2-monophosphate-Mg, 60;  $\alpha$ -tocopheryl acetate, 60; menadione, 5; nicotinic acid 120; retinol acetate, 5000 IU; cholecalciferol, 2000 IU.

<sup>2</sup>Mineral mixture (mg/kg diet): calcium dihydrogen phosphate monohydrate, 6000; five water hydroxy calcium propionate, 6540; ferrous sulphate hexahydrate, 42.5; magnesium sulphate heptahydrate, 1340; sodium dihydrogen phosphate, 1744; sodium chloride, 870; aluminium chloride hexahydrate, 3; potassium iodate, 2.5; potassium chloride, 1500; copper chloride dihydrate, 20; manganese sulphate monohydrate, 16; cobalt chloride hexahydrate, 20; zinc sulphate heptahydrate, 6.

**Table S2.** Serum biochemical indices of Chinese soft-shelled turtles fed with diets containing different curcumin levels for 6 weeks

|               | CM0                           | CM0.5                         | CM1                        | CM2                         | CM4                         |
|---------------|-------------------------------|-------------------------------|----------------------------|-----------------------------|-----------------------------|
| TP (g/L)      | 32.80 ± 1.57 <sup>a</sup>     | 40.82 ± 0.39 <sup>b</sup>     | 29.69 ± 2.06 <sup>a</sup>  | 30.19 ± 0.81 <sup>a</sup>   | 34.05 ± 1.04 <sup>a</sup>   |
| ALB (g/L)     | 7.20 ± 1.31                   | 8.13 ± 0.90                   | 6.33 ± 0.31                | 6.74 ± 0.58                 | 8.19 ± 0.22                 |
| TG (mmol/L)   | 1.50 ± 0.14 <sup>a</sup>      | 2.14 ± 0.05 <sup>ab</sup>     | 2.14 ± 0.41 <sup>ab</sup>  | 2.69 ± 0.28 <sup>b</sup>    | 3.05 ± 0.45 <sup>b</sup>    |
| TCHO (mmol/L) | 5.54 ± 0.48 <sup>a</sup>      | 6.98 ± 0.27 <sup>b</sup>      | 7.14 ± 0.24 <sup>b</sup>   | 7.11 ± 0.12 <sup>b</sup>    | 7.59 ± 0.11 <sup>b</sup>    |
| GLU (mmol/L)  | 3.28 ± 1.08                   | 3.67 ± 0.44                   | 4.02 ± 0.63                | 4.64 ± 0.30                 | 4.98 ± 0.65                 |
| ALP (U/L)     | 1180.33 ± 207.55 <sup>b</sup> | 1234.33 ± 266.68 <sup>b</sup> | 1146 ± 120.09 <sup>b</sup> | 857.67 ± 77.12 <sup>a</sup> | 832.33 ± 59.50 <sup>a</sup> |
| AST (U/L)     | 119.00 ± 7.51 <sup>c</sup>    | 122.67 ± 9.96 <sup>c</sup>    | 93.67 ± 4.70 <sup>b</sup>  | 63.33 ± 2.85 <sup>a</sup>   | 64.33 ± 2.40 <sup>a</sup>   |

TP, total protein; ALB, albumin; TG, triglyceride; TCHO, total cholesterol; GLU, glucose; ALP, alkaline phosphatase; AST, aspartate transaminase.

Data were presented as mean ± SD. Different letters in the same row represent a significant difference among groups ( $P < 0.05$ ).

**Table S3.** Primers used for qPCR

| <b>Gene ID</b> | <b>Gene symbol</b>              | <b>Forward primer (5'-3')</b> | <b>Reverse primer (5'-3')</b> |
|----------------|---------------------------------|-------------------------------|-------------------------------|
| XM_006126482.3 | <i>SLC38A1</i>                  | TCGGCATGGTACGTGGATGGT         | GGCTCCAGTCCAGGGCAGATAA        |
| XM_025179876.1 | <i>S100B</i>                    | TGGCGATGCTGAATGCGACTTC        | GGTGGCTTCTCCGATGCTTCAC        |
| XM_025190937.1 | <i>OVCH1</i>                    | CCAGACGTGTTGTCTCGGAGGAGA      | ACTGATGACGACGCCACCACA         |
| XM_006135326.3 | <i>AGTR2</i>                    | GTCTCCCTGCCCGCTTCTGTAT        | ACCGCCACCACCACACTGTT          |
| XM_006112915   | <i><math>\beta</math>-actin</i> | TGATGGACTCAGGTGACGGTGT        | GGCTGTGGTGGTGAAGCTGTAG        |

**Table S4.** Number of OTUs for each sample

| ID      | domain | phylum | class | order | family | genus | species |
|---------|--------|--------|-------|-------|--------|-------|---------|
| CM0_1_1 | 9      | 2      | 10    | 28    | 87     | 110   | 45      |
| CM0_1_2 | 12     | 2      | 3     | 58    | 91     | 84    | 40      |
| CM0_1_3 | 3      | 0      | 3     | 15    | 75     | 43    | 22      |
| CM0_1_4 | 14     | 4      | 30    | 61    | 149    | 206   | 59      |
| CM0_2_1 | 8      | 3      | 10    | 44    | 102    | 123   | 58      |
| CM0_2_2 | 21     | 7      | 36    | 52    | 179    | 243   | 80      |
| CM0_3_1 | 8      | 3      | 16    | 67    | 121    | 150   | 47      |
| CM0_4_1 | 7      | 6      | 43    | 46    | 168    | 253   | 72      |
| CM1_1_1 | 16     | 3      | 9     | 59    | 152    | 132   | 58      |
| CM1_1_2 | 10     | 3      | 29    | 51    | 273    | 195   | 88      |
| CM1_2_1 | 3      | 3      | 6     | 14    | 60     | 64    | 35      |
| CM1_2_2 | 19     | 1      | 16    | 62    | 135    | 144   | 47      |
| CM1_2_3 | 12     | 3      | 5     | 46    | 75     | 89    | 26      |
| CM1_3_1 | 13     | 3      | 21    | 47    | 193    | 198   | 92      |
| CM1_3_2 | 4      | 0      | 5     | 10    | 82     | 66    | 48      |
| CM1_3_3 | 4      | 0      | 4     | 20    | 76     | 66    | 31      |
| CM1_4_1 | 1      | 5      | 13    | 27    | 104    | 138   | 63      |
| CM4_1_1 | 3      | 6      | 27    | 167   | 355    | 334   | 134     |
| CM4_2_1 | 2      | 3      | 7     | 30    | 84     | 84    | 57      |
| CM4_2_2 | 26     | 3      | 38    | 53    | 184    | 252   | 81      |
| CM4_2_3 | 30     | 5      | 41    | 47    | 144    | 234   | 88      |
| CM4_2_4 | 12     | 2      | 25    | 28    | 125    | 207   | 76      |
| CM4_3_1 | 5      | 1      | 4     | 9     | 52     | 57    | 32      |
| CM4_4_1 | 17     | 3      | 31    | 50    | 162    | 261   | 74      |

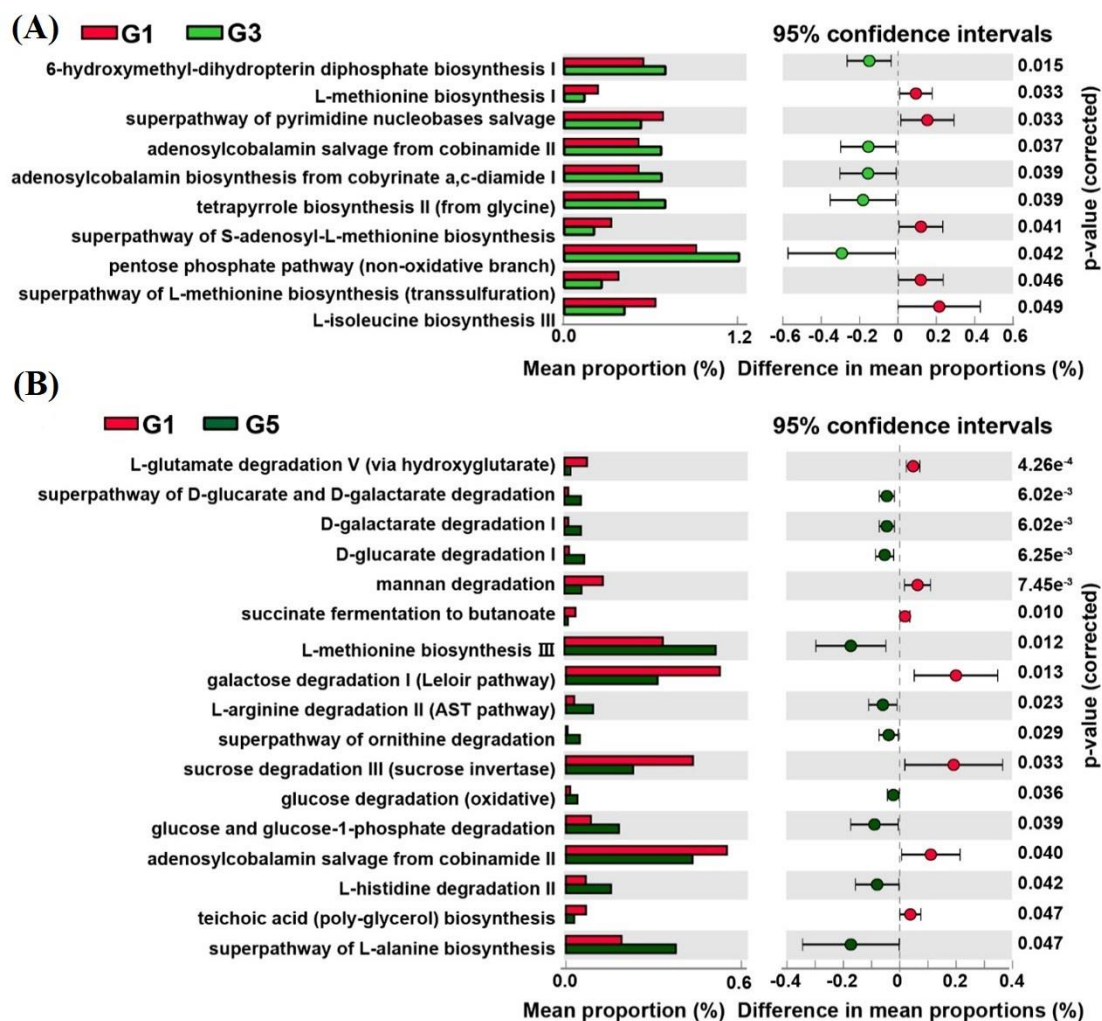

**Figure S1.** Functional prediction of changed gut microbiota by KEGG. (A) CM1 vs. CM0; (B) CM4 vs. CM0. Differences were considered significant at  $P < 0.05$  using t-test.

**(A)**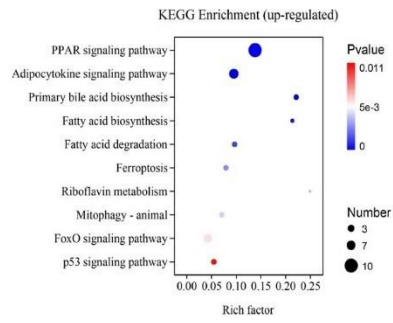**(B)**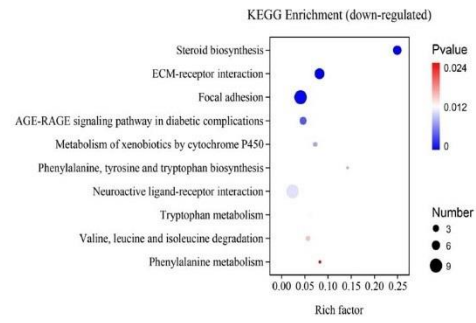**(C)**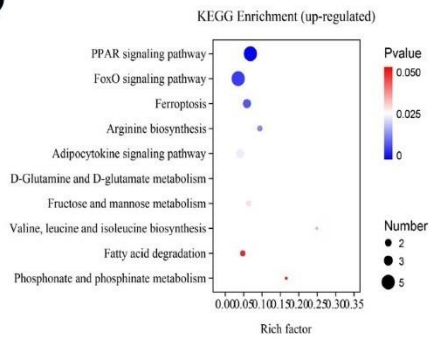**(D)**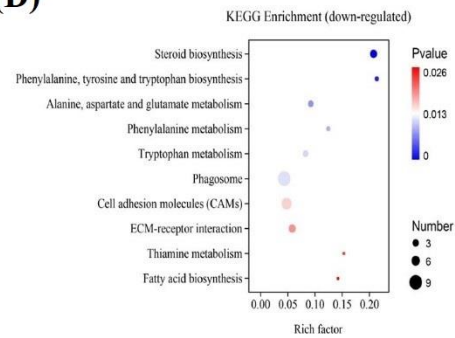

**Figure S2.** (A) Top 10 significant KEGG pathways of up-regulated genes in CM0 vs CM1 group ( $P < 0.05$ ). (B) Top 10 significant KEGG pathways of down-regulated genes in CM0 vs CM1 group ( $P < 0.05$ ). (C) Top 10 significant KEGG pathways of up-regulated genes in CM0 vs CM4 group ( $P < 0.05$ ). (D) Top 10 significant KEGG pathways of down-regulated genes in CM0 vs CM4 group ( $P < 0.05$ )
